# Supplementary material for: The role of ultra-thin MnOx co-catalysts on the photoelectrochemical properties of BiVO4 photoanodes
Source: Royal Society of Chemistry journal article supplement (doi:10.1039/d0ta00939c), 2020-01-01
Supplement: d0ta00939c1.pdf [file d0ta00939c1.pdf]

## Supplementary Information

### The role of ultra-thin $\text{MnO}_x$ co-catalysts on the photoelectrochemical properties of $\text{BiVO}_4$ photoanodes

Rowshanak Irani<sup>1</sup>, Paul Plate<sup>1</sup>, Christian Höhn<sup>1</sup>, Peter Bogdanoff<sup>1</sup>, Markus Wollgarten<sup>1</sup>, Katja Höflich<sup>1</sup>,  
Roel van de Krol<sup>1</sup>, Fatwa F. Abdi<sup>1,\*</sup>

<sup>1</sup> Institute for Solar Fuels, Helmholtz-Zentrum Berlin für Materialien und Energie GmbH, Hahn-Meitner-  
Platz 1, Berlin 14109, Germany

\* correspondence: [fatwa.abdi@helmholtz-berlin.de](mailto:fatwa.abdi@helmholtz-berlin.de)

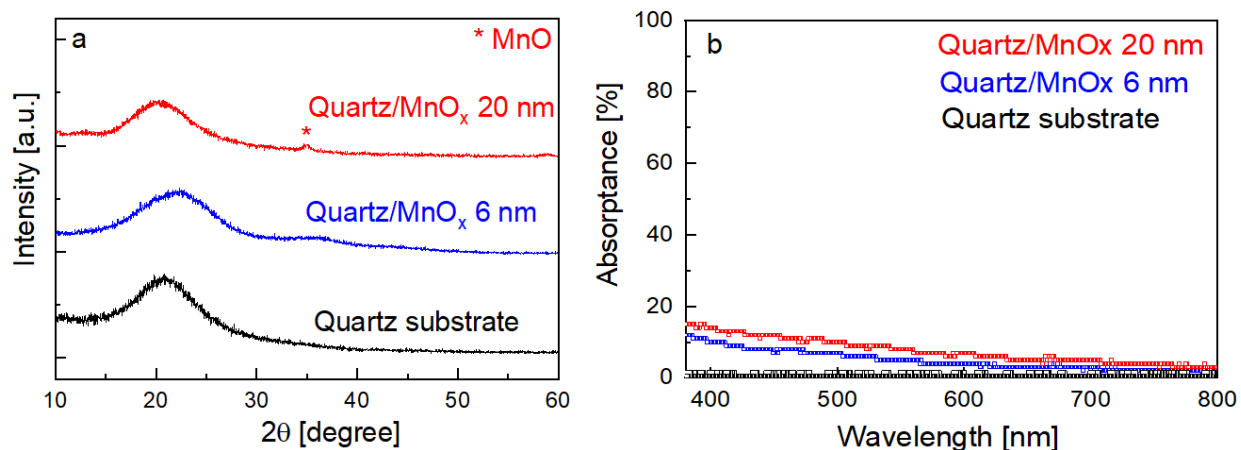

**Figure S1.** **a)** X-ray diffractograms for the quartz substrate and  $\text{MnO}_x$  samples deposited on quartz (6 and 20 nm). **b)** The absorbance of the quartz substrate and different thicknesses of  $\text{MnO}_x$  (6 and 20 nm) deposited on quartz.

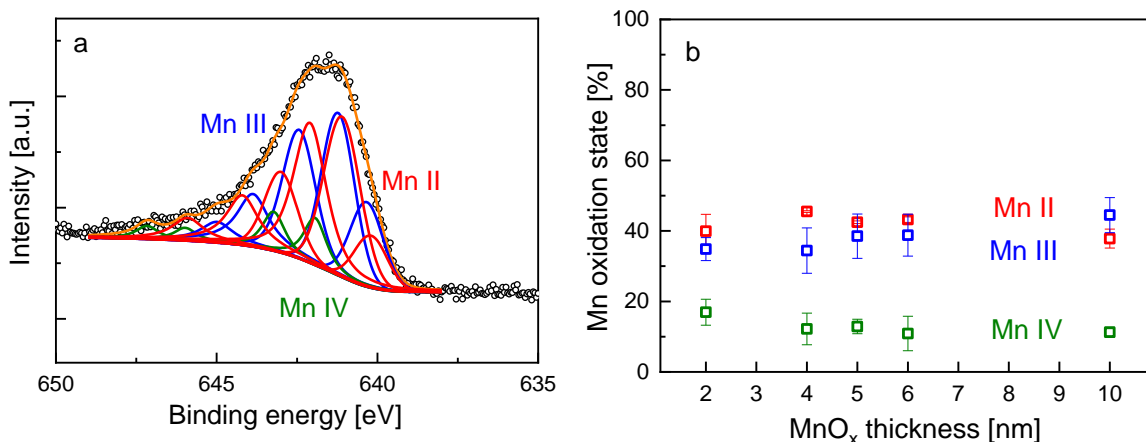

**Figure S2.** a) A fitting example of Mn  $2p_{3/2}$  core-level peak to quantify the manganese oxidation states in  $\text{BiVO}_4/\text{MnO}_x$  4 nm, based on the fitting procedure described in Biesinger et al. *Appl. Surf. Sci.* **257**, 2011, 2717-2730. b) The oxidation states of the  $\text{MnO}_x$  films with different thicknesses.  $\text{Mn}^{2+}$ ,  $\text{Mn}^{3+}$ , and  $\text{Mn}^{4+}$  are present in all of the samples with similar percentages regardless of the thickness.

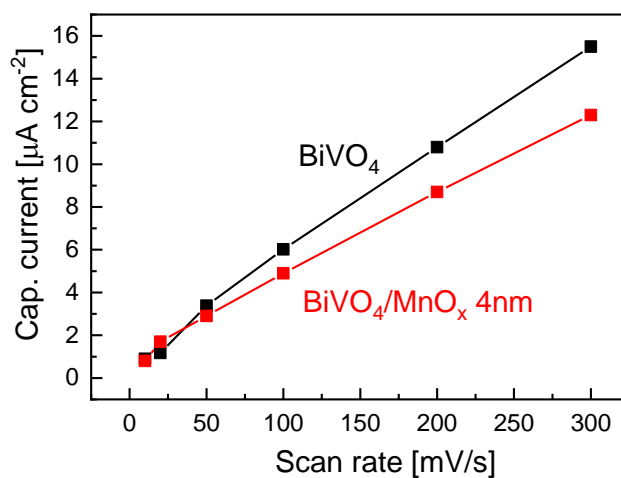

**Figure S3.** Capacitive current density of the  $\text{BiVO}_4$  and  $\text{BiVO}_4/\text{MnO}_x$  (4 nm) films as a function of the applied potential scan rate. The ratio of the slope of these curves represents the ratio of the electrochemically active surface area (ECSA) of the films.

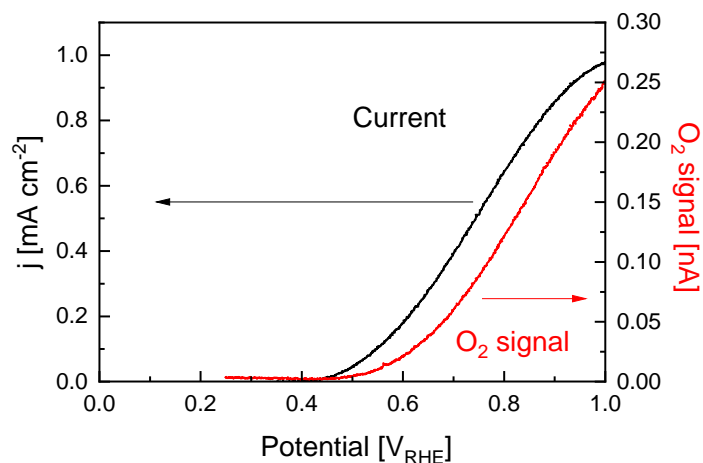

**Figure S4.** Electrochemical mass spectrometry (EMS) data obtained during LSV scans of the BiVO<sub>4</sub>/MnO<sub>x</sub> (4 nm) photoanode. The current density is shown in black and the O<sub>2</sub> signal in red. Measurements were done in 0.5 M KP<sub>i</sub> (pH ~7) under back illumination with a scan rate of 2 mV/s. The slight delay between the current and the O<sub>2</sub> signal is due to the time it takes for the O<sub>2</sub> molecules to diffuse from the surface of the photoanode to the mass spectrometer.

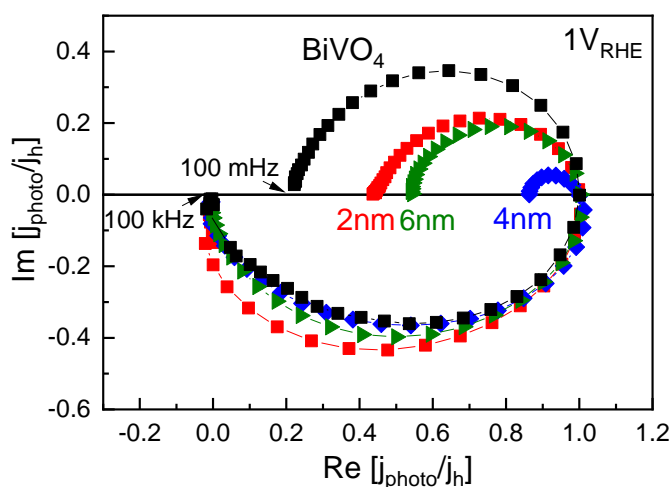

**Figure S5.** IMPS spectra of bare BiVO<sub>4</sub> photoanode and BiVO<sub>4</sub> coated with different thicknesses of MnO<sub>x</sub> co-catalyst (2, 4, 6 nm) under 1 V<sub>RHE</sub> applied potentials.

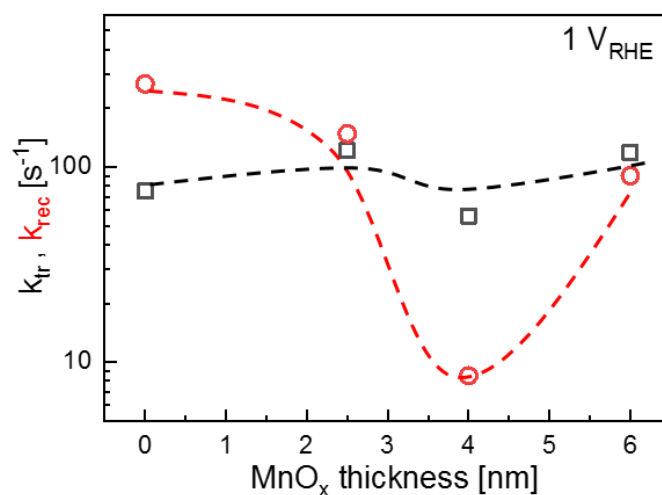

**Figure S6.** Charge transfer ( $k_{tr}$ ) and surface recombination ( $k_{rec}$ ) rate constants for  $\text{BiVO}_4$  samples with different thicknesses of  $\text{MnO}_x$  co-catalyst at  $1 \text{ V}$  vs. RHE. The dash line is added as a guide to the eye.

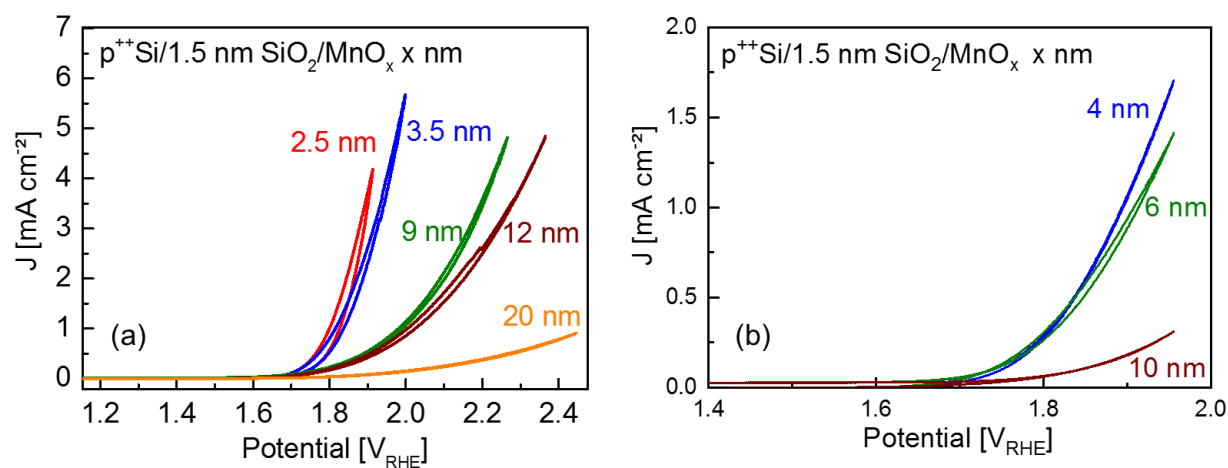

**Figure S7.** Cyclic voltammogram of  $\text{MnO}_x$  films with different thicknesses on  $\text{p}^{++}\text{Si}/1.5 \text{ nm SiO}_2$  substrate measured in (a)  $0.1 \text{ M KOH}$  and (b)  $0.1 \text{ M KP}_i$  electrolyte (pH  $\sim 7$ ). The measurement was taken with a scan rate of  $10 \text{ mV/s}$ .

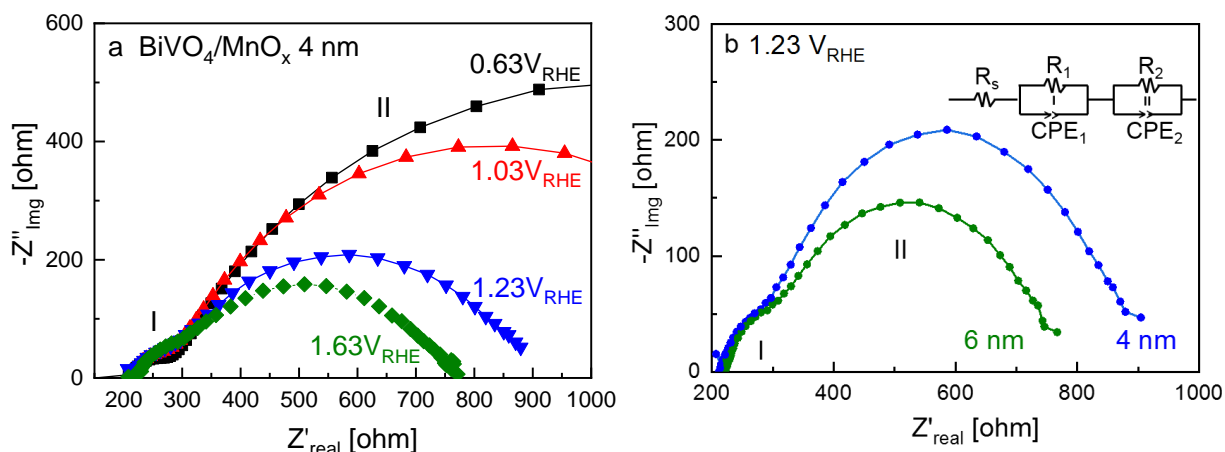

**Figure S8. a)** Nyquist plots for EIS data measured for 4 nm  $\text{MnO}_x$  coated  $\text{BiVO}_4$  in  $\text{KP}_i$  (pH~7.38). Various potentials have been applied (0.63, 1.03, 1.23, and 1.63 V vs. RHE). **b)** A comparison between the Nyquist plot of the 4 and 6 nm  $\text{MnO}_x$  in  $\text{BiVO}_4/\text{MnO}_x$  system at 1.23 V vs. RHE. Both experiments were performed under a 455 nm LED with  $20 \text{ mWcm}^{-2}$  power density. The inset shows the equivalent circuit which was employed for fitting.

**Table S1.** The extent of band bending in our  $\text{BiVO}_4$  films with various thicknesses of  $\text{MnO}_x$ , as calculated from the difference of our measured XPS core-level peak position (i.e., surface,  $E^S$ ) and the corresponding peak position in the bulk ( $E^B$ );  $E_{\text{band bending extend (bb)}} = E^B - E^S$ . The binding energies of the single crystal  $\text{BiVO}_4$  are assumed to be valid for the bulk, which were reported to be 159.3 and 516.9 eV for Bi  $4f_{7/2}$  and V  $2p_{3/2}$ , respectively (Favaro et al. *J. Phys. Chem. C* **123**, 2019, 8347-8359).

| $\text{MnO}_x$ thickness (nm) | $E_{\text{Bi } 4f}^S$ (eV) | $E_{\text{V } 2p}^S$ (eV) | $E_{bb}^{\text{Bi } 4f} = E^B - E^S$ (eV) | $E_{bb}^{\text{V } 2p} = E^B - E^S$ (eV) |
|-------------------------------|----------------------------|---------------------------|-------------------------------------------|------------------------------------------|
| 0                             | 159.00                     | 516.70                    | 0.30                                      | 0.20                                     |
| 2                             | 158.95                     | 516.65                    | 0.35                                      | 0.25                                     |
| 4                             | 158.95                     | 516.60                    | 0.35                                      | 0.30                                     |
| 5                             | 158.85                     | 516.50                    | 0.45                                      | 0.40                                     |
| 6                             | 158.85                     | 516.45                    | 0.45                                      | 0.45                                     |
